# Supplementary material for: Flipped C-Terminal Ends of APOA1 Promote ABCA1-dependent Cholesterol Efflux by Small HDLs
Source: PubMed Central journal article supplement — medRxiv. 2023 Nov 4:2023.11.03.23297986. Preprint. [Version 1] doi: 10.1101/2023.11.03.23297986 (PMC10635269; doi:10.1101/2023.11.03.23297986), 2023-11-04
Supplement: media-1.pdf [file media-1.pdf]

## Supplemental Material

### Supplemental Methods

**Materials.** Recombinant APOA1 (both regular and <sup>15</sup>N-labeled) were generated as described.<sup>21</sup> The sequence of recombinant APOA1 was identical to that of mature human APOA1.

**Chemical crosslinking of APOA1 and isolation of r-HDL particles.** Reconstituted HDLs (r-HDLs) were crosslinked with EDC in phosphate-buffered saline (pH 6.5) and identified as described.<sup>20,26</sup> Crosslinking reactions were carried out in phosphate-buffered saline at 4°C with final concentrations of 20 mM EDC and 0.56 mg/mL APOA1 protein. After a 12-h incubation, the reactions were quenched with 1 M ammonium acetate (final concentration 50 mM). The reaction mixtures were further fractionated by high-resolution size exclusion chromatography (Superdex 200, 350 µL flow/min) to isolate monomeric HDL particles. Purified crosslinked HDL was exchanged into 50 mM ammonium bicarbonate with Amicon Ultra 10K centrifugal filter devices (Millipore, Eschborn, Germany) and stored at 4°C for MS/MS analysis.

**Proteolytic digestion for MS/MS analysis.** r-HDLs were incubated overnight at 37°C with sequencing grade modified trypsin (Promega, Madison, WI) at a ratio of 20:1 (w/w) protein/trypsin in 100 mM NH<sub>4</sub>HCO<sub>3</sub>, pH 8. Digestion was halted by acidification (pH 2–3) with trifluoroacetic acid.

**Tandem MS/MS analysis.** Capillary LC-ESI-MS/MS was performed using an IntegraFrit capillary trapping column packed with 1.5 cm of C18 (150 µM × 11 cm, New Objective, Woburn, MA; Magic C18, 5 µM, 200 Å, Michrom BioResources, Auburn, CA), a capillary analytical column packed with 15 cm of C18 (75 µM × 15 cm, Magic C18, 5 µM, 100 Å, Michrom BioResources, Auburn, CA), an LTQ Orbitrap XL mass spectrometer (Thermo Electron, Bremen, Germany), and a nanoACQUITY UPLC system (Waters, Milford, MA). To remove salts and contaminants in each experiment, ~1 µg of tryptic digest was injected onto the trapping column and flushed for 10 min with a mobile phase of 0.1% TFA in 97:3 water/ACN at a flow rate of 3 µL/min. The flow rate was then reduced to 0.3 µL/min, effluent from the trapping column was directed to the capillary LC column, and an 80-min gradient between 2% and 40% mobile phase B (0.1% TFA in ACN) was implemented. Eluting peptides were electrosprayed into an LTQ-Orbitrap mass spectrometer operating in data-dependent mode to acquire a full MS scan (400–2000 m/z), and subsequent MS/MS scans were acquired for the five most intense precursor ions. CID of the precursors occurred in the LTQ at 35% normalized collision energy. Isolation width was set to 2 m/z, and monoisotopic precursor selection was enabled. MS/MS scans were acquired in both the ion trap and orbitrap. Charge state rejection was enabled for 1+ and 2+ charge states, as crosslinked peptides formed in these experiments tend to have a higher charge state upon ESI than non-crosslinked (linear peptide) species. Rejection of low charge states from MS/MS acquisition provides a useful bias for detecting crosslinks. MS/MS spectrum lists in the raw files were extracted and converted to mzXML files, using ReAdW (version 4.6.0) for database searching.

**MS data analysis.** The MS/MS data in the mzXML files were subsequently searched against the database for crosslinks, using xQuest (version 2.1.1).<sup>26</sup> The database is built from the sequence of APOA1 for the r-HDL experiment or 39 HDL proteins for human

47 HDL crosslinking results. xQuest is an algorithm that can search for theoretical  
48 crosslinks whose masses match measured precursor masses and to subsequently  
49 assign the fragment masses of MS/ MS spectra. In its interpretation of MS/MS spectra,  
50 xQuest assumes that a crosslink precursor will fragment at only one peptide bond. For  
51 our searches, xQuest was used with default settings, except that mass shifts for  
52 crosslinking products were manually set to  $-18.010564686$  for the “xlink mass-shift.”

53 The modified residues were set to Lys, Asp, and Glu. Matches from all searches were  
54 required to have precursor mass errors  $\leq 4.3$  ppm and  $\geq 5\%$  of the ion current in a given  
55 MS/MS spectrum assigned as b- and y-type ions. xQuest matches for intra-protein and  
56 inter-protein crosslinks were required to meet different scoring thresholds. Intra-protein  
57 crosslink matches were required to have xQuest scores  $\geq 25$ . Inter-protein crosslink  
58 matches were required to have xQuest scores  $\geq 29$ . Inter-protein crosslink matches were  
59 disregarded unless three unique fragments were assigned on each peptide chain.  
60 Spectra matches were assessed for this characteristic after assigning neutral losses  
61 and second isotopic peaks. In addition, crosslink matches were required to have at least  
62 8 of these sequence-specific fragments assigned. Finally, spectra that corresponded to  
63 crosslinks, either intra-protein or inter-protein, with multiple possible linkage patterns,  
64 were manually inspected. Exact linkages were proposed only when two crosslinked  
65 residues could be unequivocally defined by the observed fragmentation.

66 **Incubation of control and LCAT-deficient plasma with LCAT.** Plasma (150  $\mu\text{L}$ ) from  
67 3 LCAT $^{-/-}$  subjects and 3 control subjects were incubated with or without 50  $\mu\text{g}/\text{mL}$   
68 recombinant human LCAT<sup>32</sup> at 37°C for 1 h followed by addition of DTNB (2 mM final  
69 concentration) to inhibit the enzyme. Because DTNB interferes with Amplex red  
70 cholesterol assay, prior to addition of DTNB an aliquot (20  $\mu\text{L}$ ) was taken for cholesterol  
71 assays and immediately chilled on ice. ABCA1-specific CEC was measured in ABCA1-  
72 expressing BHK cells as described in Methods, **Figure 5** and **Supplemental Fig. S3**.

73 **Molecular dynamics (MD) simulations of the APOA1 structures in rHDL.** We used  
74 Anton 2 (a specialized supercomputer designed to accelerate molecular  
75 dynamics simulations) to study the dynamic structure of APOA1 molecules. Anton 2  
76 rapidly generates all-atom trajectories for much longer time intervals (10's of  
77 microseconds) than possible on other computer systems which greatly increases  
78 confidence in the results because of increased sampling.

79 **All-atom and CG simulations of r-HDL-90 (20  $\mu\text{s}$  all-atom, 15  $\mu\text{s}$  simulated  
80 tempering, 200  $\mu\text{s}$  CG).** Structures for r-HDL-80 and r-HDL-90 were generated using a  
81 sequence of conventional all-atom MD, simulated tempering (ST), and coarse-grained  
82 (CG) simulations.<sup>27-29</sup> The initial configuration of a 20  $\mu\text{s}$ -long all-atom simulation of r-  
83 HDL-90 was developed by removing POPC and cholesterol from a disc of r-HDL-100.<sup>27</sup>  
84 The disc was solvated by water and 0.15 mM NaCl, using CHARMM-GUI.<sup>29</sup> The box  
85 was cubic ( $A = B = C = 137 \text{ \AA}$ ) and the pressure was applied isotropically. The total  
86 number of particles was  $\sim 258,000$ , including 100 POPC and 10 cholesterol. The system  
87 was first equilibrated for  $\sim 2$  ns on an in-house computer cluster (Biowulf) to generate an  
88 initial structure that was then further developed on the Anton-2 supercomputer.

89 To enhance sampling of the conformation space, a series of successive ST simulations  
90 totaling 15  $\mu\text{s}$  on the Anton-2 supercomputer extended the 20  $\mu\text{s}$ -long conventional MD

91 simulation of r-HDL-90. One hundred and seventeen temperatures, ranging from 310 K  
92 to 450 K and distributed exponentially,<sup>28</sup> comprised the temperature ladder of ST  
93 simulations. Prior to ST simulations, the 20  $\mu$ s frame of conventional MD was simulated  
94 for 5 ns at the 117 temperatures. The following equation determined the weights for the  
95 first ST simulation:

$$96 \quad g_{n+1} - g_n = \left( \frac{1}{k_B T_{n+1}} - \frac{1}{k_B T_n} \right) \frac{E_{n+1} + E_n}{2}, \quad \text{Equation 1}$$

97 where  $g$ ,  $T$ ,  $E$ , and  $k_B$  are the weight, temperature, energy, and Boltzmann's constant.  
98 The weights and maximum temperatures were further adjusted for subsequent ST  
99 simulations on an ad hoc basis to allow for more frequent transitions and to avoid long  
100 residence at certain temperatures. The exchange was allowed between adjacent  
101 temperature ladders with the following probability:

$$102 \quad p(T_n \rightarrow T_{n+1}) = \min \left\{ 1, e^{\left( \frac{1}{k_B T_n} - \frac{1}{k_B T_{n+1}} \right) E_n + (g_{n+1} - g_n)} \right\}. \quad \text{Equation 2}$$

103 Note that the probability is determined by the weight difference between two ladders  
104 rather than each weight.

105 A 200  $\mu$ s-long CG simulation with the Martini force field on Gromacs (www.gromacs.org,  
106 version 2016.6) completed the study of r-HDL-90. The CG simulation frames were  
107 converted to all-atom for developing the contact maps.

108 **All-atom and CG simulations of r-HDL-80 (1  $\mu$ s all-atom, 200  $\mu$ s CG).** The initial  
109 configuration of a 1  $\mu$ s-long all-atom simulation of r-HDL-80 was developed by removing  
110 POPC and cholesterol from the last configuration of the 20  $\mu$ s-long conventional MD of  
111 r-HDL-90. The disc was solvated by water and 0.15 mM NaCl, using CHARMM-GUI.<sup>29</sup>  
112 The number of phospholipid and cholesterol molecules in each size of r-HDL were  
113 determined using nondenaturing gradient gel electrophoresis.<sup>30</sup> The box was cubic ( $A =$   
114  $B = C = 126 \text{ \AA}$ ) and the pressure was applied isotropically. The total number of particles  
115 was  $\sim 200,000$ , including 50 POPC and 5 cholesterol (the number of phospholipid and  
116 cholesterol molecules are per particle, following the notation of our previous  
117 simulations.<sup>27</sup> We choose the relatively large box size for r-HDL-80 (compared to that of  
118 r-HDL-90) because its APOA1 terminals exhibit enhanced mobility relative to r-HDL-90  
119 particles. The use of a sufficiently large box size ensured that the protein does not  
120 interact with its periodic image during MD simulation. Consequently, reducing the  
121 number of lipids in rHDL-90 by half to obtain rHDL-80 does not necessarily result in a  
122 significantly smaller box size.

123 The system was first analyzed for  $\sim 2$  ns on an in-house computer cluster (Biowulf). The  
124 main simulation was carried out on the Anton-2 supercomputer. A 200  $\mu$ s-long CG  
125 simulation with the Martini force field on Gromacs completed the study of r-HDL-80. The  
126 CG simulation frames were converted to all-atom for developing the contact maps.

#### 127 **Additional details of all-atom simulations.**

128 CHARMM36 was used for lipid and protein force field parameters. The TIP3P water  
129 model modified for CHARMM was used to describe water molecules. Lennard-Jones  
130 (LJ) parameters of  $\text{Na}^+$  and  $\text{Cl}^-$  as well as  $\text{Na}^+$  and selected oxygens of lipids and  
131 proteins were taken from the CHARMM 36 ion force field parameters (NBFIX).

132 In-house all-atom trajectories were generated using CHARMM with a leapfrog Verlet  
 133 algorithm and a time step of 2 fs. Temperature and pressure were kept at 310 K and 1  
 134 bar using Nose-Hoover thermostat and Langevin piston barostat ( $\gamma = 0$ ), respectively.  
 135 Masses of the temperature and pressure pistons were 20% and 2% of the system  
 136 masses, respectively. Lennard–Jones potentials were terminated at 12 Å, with a  
 137 smoothing function operating between 8 Å and 12 Å. Electrostatics were evaluated  
 138 using particle-mesh Ewald with approximately 1 grid point per Å, a sixth-order spline  
 139 interpolation for the complementary error function, a real-space cutoff of 12 Å, and  $k =$   
 140 0.32. All bonds to hydrogen atoms were constrained using SHAKE.

141 For the Anton2 simulation, a multigrator, which minimizes sources of error associated  
 142 with limited-precision arithmetic and truncation errors, generated trajectories with a time  
 143 step of 2 fs. Temperature and pressure were kept constant at 310 K and 1 bar,  
 144 respectively, using a variant of Nosé–Hoover and the Martyna–Tobias–Klein.  
 145 Electrostatic forces were calculated using the u-series method. Water molecules and all  
 146 bond lengths to hydrogen atoms were constrained using M-SHAKE.

147

148

### Supplemental Tables

149 **Table S1. LCAT mutations (nomenclature according to HGMD) of the Italian**  
 150 **cohort<sup>31</sup>**

| Nucleotide Change   | Amino acid change   | Genotype     | Number of carriers |
|---------------------|---------------------|--------------|--------------------|
| c.511C>T            | Arg171Trp           | Homozygote   | 1                  |
| c.893C>T            | Thr298Ile           | Homozygote   | 1                  |
| c.1007A>G/c.1132G>A | Tyr336Cys/Glu378Lys | Compound     | 2                  |
| c.31delG            | Val11*              | Heterozygote | 2                  |
| c.511C>T            | Arg171Trp           | Heterozygote | 1                  |
| c.893C>T            | Thr298Ile           | Heterozygote | 3                  |

151

152

153

154

155

156

**Table S2. Crosslinks in r-HDLs identified by MS/MS analysis.**

|               | r-HDL-80   |         |                    | r-HDL-88   |         |                    | r-HDL-96   |         |                    | r-HDL-120  |         |                    |
|---------------|------------|---------|--------------------|------------|---------|--------------------|------------|---------|--------------------|------------|---------|--------------------|
|               | Crosslinks | XL Type | Relative Intensity | Crosslinks | XL Type | Relative Intensity | Crosslinks | XL Type | Relative Intensity | Crosslinks | XL Type | Relative Intensity |
| N-terminus    | K23-D51    | intra   | Weak               | K23-D28    | intra   | Weak               | K23-D48    | intra   | Medium             | D28-K133   | intra   | Weak               |
|               | D28-K12    | intra   | Weak               | E34-K45    | intra   | Strong             | K45-E34    | intra   | Medium             | E80-K88    | intra   | Medium             |
|               | K45-E34    | intra   | Strong             | E76-K12    | intra   | Weak               | E76-K12    | intra   | Medium             |            |         |                    |
|               | K59-D28    | intra   | Weak               |            |         |                    |            |         |                    |            |         |                    |
|               | K59-E78    | intra   | Weak               |            |         |                    |            |         |                    |            |         |                    |
|               | D73-K12    | intra   | Weak               |            |         |                    |            |         |                    |            |         |                    |
|               | E76-K12    | intra   | Weak               |            |         |                    |            |         |                    |            |         |                    |
| Center region | K96-E169   | inter   | Strong             | K96-E169   | inter   | Strong             | K96-E147   | inter   | Medium             | K96-E169   | inter   | Strong             |
|               | K96-E147   | inter   | Weak               | K96-E146   | inter   | Weak               | K96-D168   | inter   | Medium             | K96-D168   | inter   | Weak               |
|               | K106-E125  | inter   | Weak               | K140-E125  | inter   | Medium             | K96-E169   | inter   | Strong             | K96-E146   | inter   | Weak               |
|               | K140-E125  | inter   | Weak               | K195-E70   | inter   | Strong             | K107-E125  | inter   | Weak               | K118-E147  | inter   | Medium             |
|               |            |         |                    |            |         |                    | K107-D157  | inter   | Medium             | E125-K118  | inter   | Weak               |
|               |            |         |                    |            |         |                    | K118-E147  | inter   | Strong             | K133-E128  | inter   | Weak               |
|               |            |         |                    |            |         |                    | K133-E111  | inter   | Weak               | K133-E125  | inter   | Medium             |

|                    |           |       |        |           |       |        |           |       |        |           |       |        |
|--------------------|-----------|-------|--------|-----------|-------|--------|-----------|-------|--------|-----------|-------|--------|
|                    |           |       |        |           |       |        | K133-E125 | inter | Medium | E139-K118 | intra | Weak   |
|                    |           |       |        |           |       |        | K140-E125 | inter | Strong | K140-E125 | inter | Strong |
|                    |           |       |        |           |       |        |           |       |        | E147-K133 | intra | Weak   |
| C-terminus         | K77-E191  | inter | Medium | K77-E191  | inter | Medium | K195-E70  | inter | Medium | K182-E191 | intra | Weak   |
|                    | K96-E198  | intra | Weak   | K96-D198  | inter | Weak   | K208-E198 | intra | Medium | E198-K208 | intra | Weak   |
|                    | K96-E235  | intra | Medium | K195-E78  | inter | Medium | K208-E223 | intra | Medium | E205-K208 | intra | Strong |
|                    | K195-E234 | intra | Medium | K195-E235 | intra | Weak   |           |       |        | E198-K182 | intra | Weak   |
|                    | K226-E78  | intra | Weak   | E234-K208 | intra | Weak   |           |       |        |           |       |        |
|                    | K226-E205 | intra | Weak   | E234-K182 | intra | Medium |           |       |        |           |       |        |
|                    | E235-K182 | intra | Medium | E235-K208 | intra | Weak   |           |       |        |           |       |        |
| N-C terminus links | D48-K238  | inter | Weak   |           |       |        | K238-E34  | intra | Weak   |           |       |        |

**Table S3. HDL particle concentration of study subjects as determined by calibrated IMA.**

| HDL Species                 | Control subjects (n=14) | LCAT-heterozygous subjects (n=6) | LCAT-deficient subjects (n=6) | <i>P</i> -value |
|-----------------------------|-------------------------|----------------------------------|-------------------------------|-----------------|
| Total-HDL ( $\mu\text{M}$ ) | 14.9 $\pm$ 2.5          | 8.3 $\pm$ 2.9                    | 2.9 $\pm$ 1.3                 | <0.0001         |
| XS-HDL ( $\mu\text{M}$ )    | 0.6 $\pm$ 0.4           | 1.6 $\pm$ 0.7                    | 1.2 $\pm$ 0.7                 | 0.0017          |
| S-HDL ( $\mu\text{M}$ )     | 1.9 $\pm$ 1.2           | 2.5 $\pm$ 1.0                    | 0.4 $\pm$ 0.6                 | 0.009           |
| M-HDL ( $\mu\text{M}$ )     | 7.7 $\pm$ 1.8           | 3.4 $\pm$ 1.4                    | 0.5 $\pm$ 0.5                 | <0.0001         |
| L-HDL ( $\mu\text{M}$ )     | 4.6 $\pm$ 1.7           | 0.8 $\pm$ 0.4                    | 0.9 $\pm$ 0.5                 | <0.0001         |

*P*-values are from a mixed effect model and Tukey-Kramer post-tests.

## Supplemental Figures

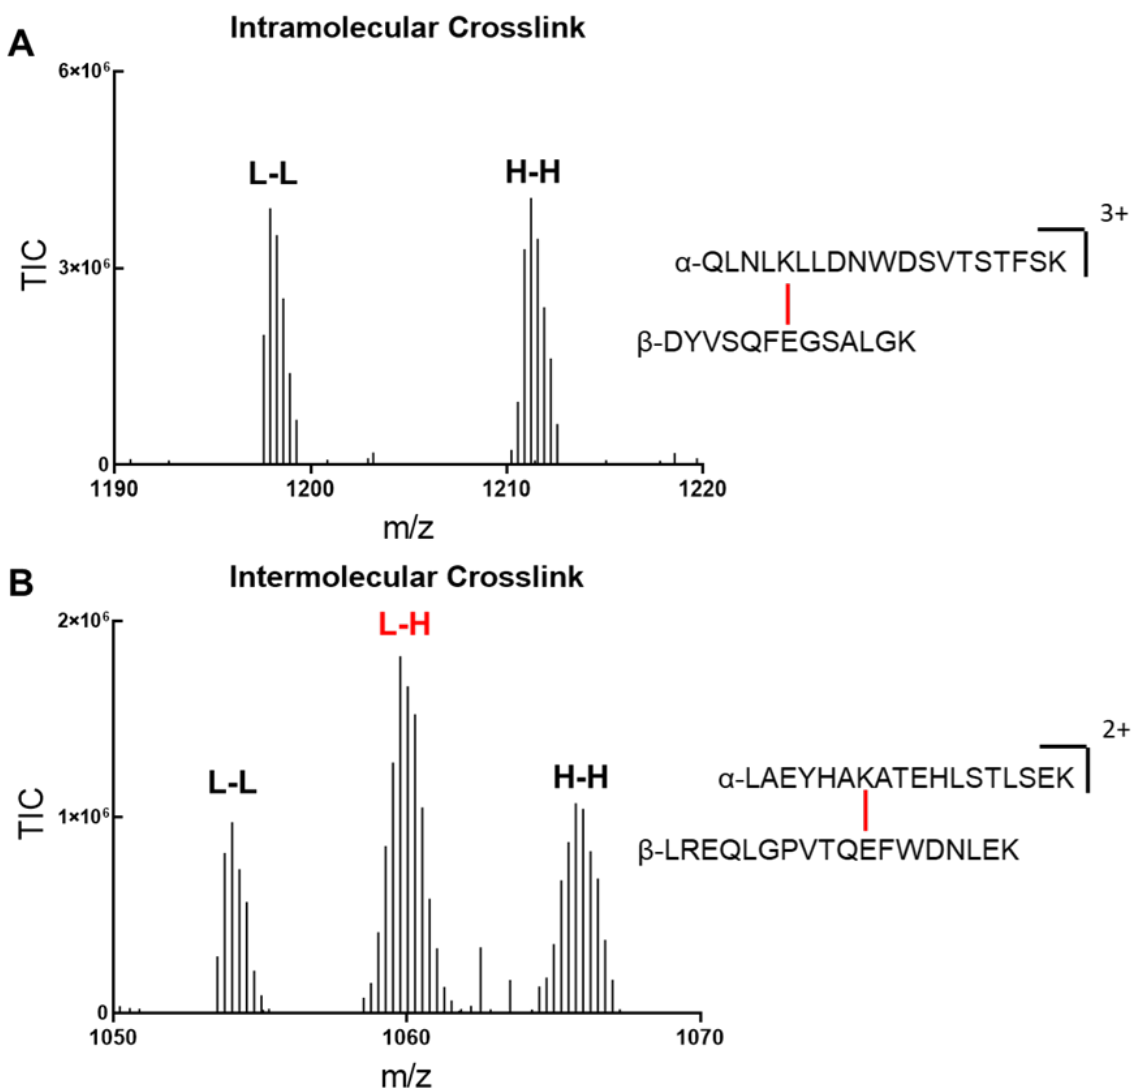

**Figure S1. Representative MS spectra of an (A) intramolecular crosslink (K45–E34) and (B) intermolecular crosslink (K195–E70) of APOA1 detected in r-HDL. MS1 spectra of (A) intra-protein crosslink QLNLKLLDNWDSVTSTFSK-DYVSQFEGSALGK and (B) inter-protein crosslink LAEYHAKATEHLSTLSEK-LREQLGPVTQEFWDNLEK.**



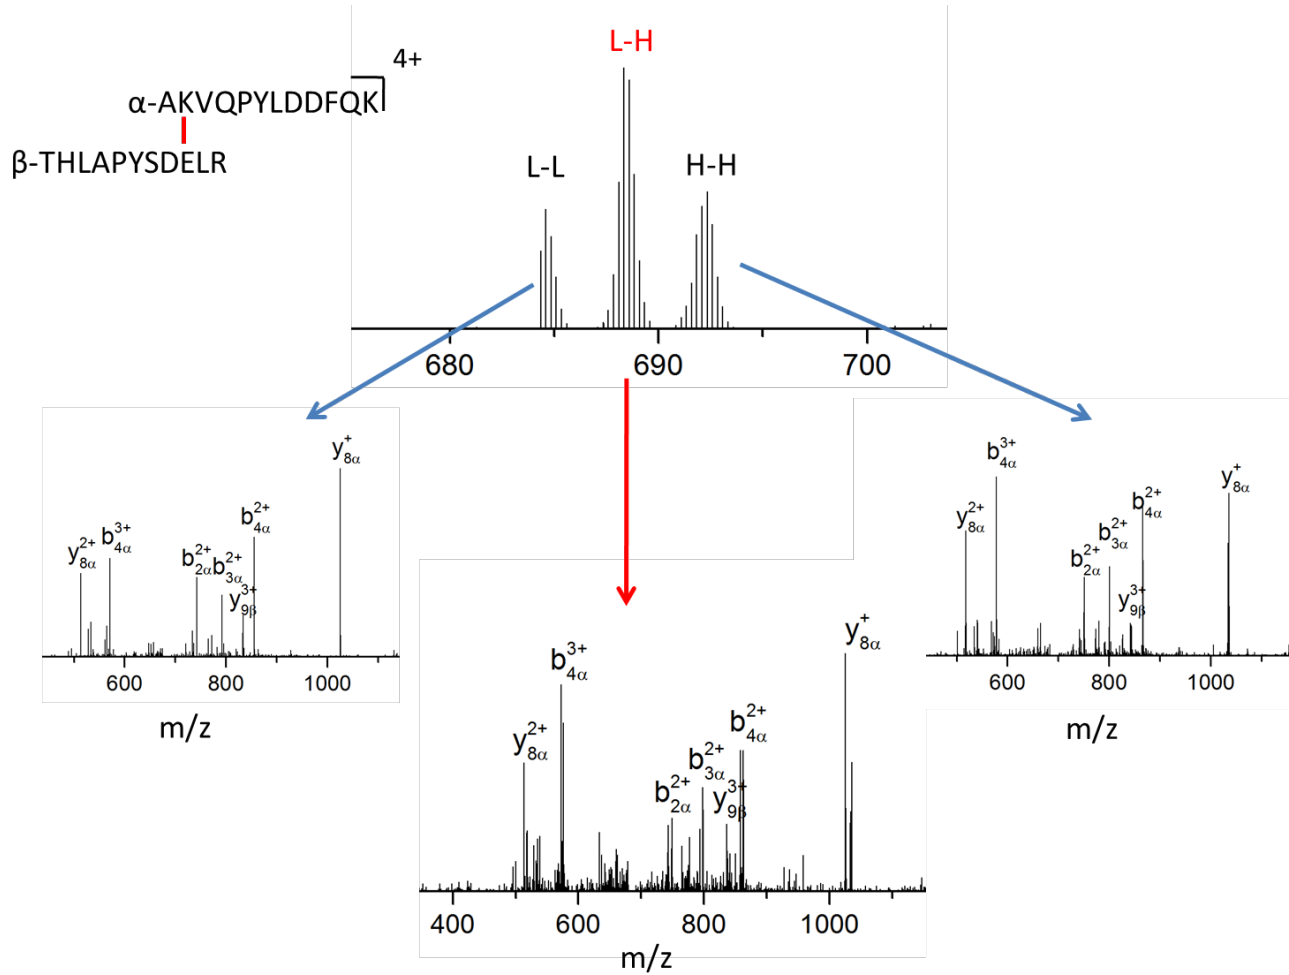

**Figure S2. Representative MS1 and MS/MS spectra of the intermolecular crosslink K96-E169 of APOA1 in r-HDL. Interpeptide crosslink AKVQPYLDDFQK-THLAPYSDELR.**

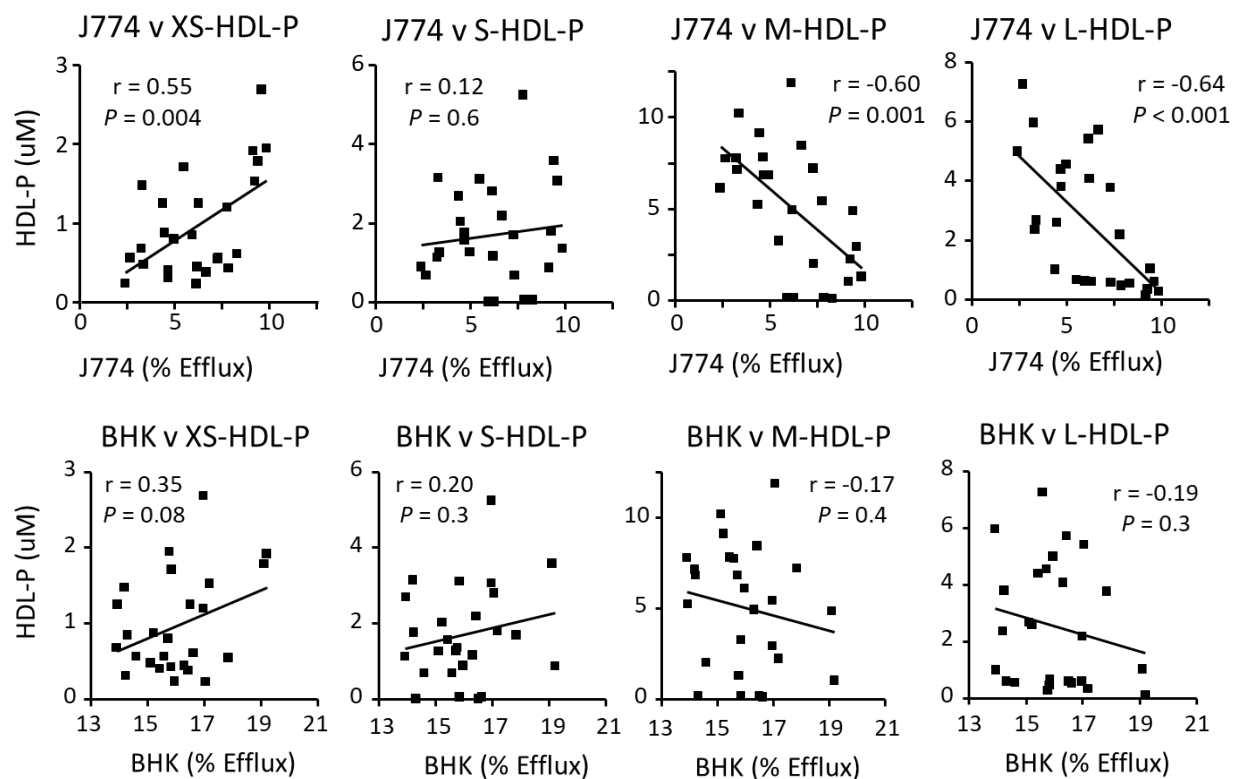

**Figure S3. Scatter plots of the correlations of macrophage (J774 cells) and ABCA1 (BHK cells) CEC of serum HDL with HDL subspecies for all subjects in the LCAT study cohort.** CEC was quantified as described in Fig. 5 of the paper.  $r$ , Pearson correlation.
